# Supplementary material for: Modification of Density Dependence and Habitat Filtering on Seedling Survival of Different Mycorrhizal-Type Tree Species in Temperate Forests
Source: MDPI journal article supplement (doi:10.3390/f14091919), 2023-09-21
Supplement: s1 [file s1]

## Supporting information

**Table S1.** Mycorrhizal types (AM, arbuscular mycorrhizae; EcM, ectomycorrhizae) of species of tree seedlings during forest succession.

| Species                                              | Mycorrhizal type | Reference    |
|------------------------------------------------------|------------------|--------------|
| <i>Abies nephrolepis</i>                             | EcM              | FRED3.0      |
| <i>Acer barbinerve</i>                               | AM               | FRED3.0      |
| <i>Acer komarovii</i>                                | AM               | FRED3.0      |
| <i>Acer mandshuricum</i>                             | AM               | Qin et al.   |
| <i>Acer mono</i>                                     | AM               | Qin et al.   |
| <i>Acer pseudosieboldianum</i>                       | AM               | FRED3.0      |
| <i>Acer tegmentosum</i>                              | AM               | FRED3.0      |
| <i>Acer ukurunduense</i>                             | AM               | Qin et al.   |
| <i>Betula costata</i>                                | EcM              | FRED3.0      |
| <i>Betula dahurica</i>                               | EcM              | FRED3.0      |
| <i>Betula platyphylla</i>                            | EcM              | FRED3.0      |
| <i>Cerasus maximowiczii</i>                          | AM               | Ren et al.   |
| <i>Fraxinus mandschurica</i>                         | AM               | FRED3.0      |
| <i>Maackia amurensis</i>                             | AM               | FRED3.0      |
| <i>Malus baccata</i>                                 | AM               | FRED3.0      |
| <i>Padus avium</i>                                   | AM               | Jiang et al. |
| <i>Phellodendron amurense</i>                        | AM               | FRED3.0      |
| <i>Picea jezoensis</i> Carr. var. <i>microsperma</i> | EcM              | FRED3.0      |
| <i>Pinus koraiensis</i>                              | EcM              | FRED3.0      |
| <i>Populus davidiana</i>                             | EcM              | FRED3.0      |
| <i>Quercus mongolica</i>                             | EcM              | FRED3.0      |
| <i>Tilia amurensis</i>                               | EcM              | FRED3.0      |
| <i>Tilia mandshurica</i>                             | EcM              | Qin et al.   |
| <i>Ulmus davidiana</i> var. <i>japonica</i>          | EcM              | Qin et al.   |
| <i>Ulmus laciniata</i>                               | EcM              | Qin et al.   |

**Table S2.** Soil variables at different stages of forest succession (mean  $\pm$  standard error).

|                      | Early stage        | Mid stage          | Late stage         |
|----------------------|--------------------|--------------------|--------------------|
| Organic matter (%)   | 16.790 $\pm$ 0.403 | 17.225 $\pm$ 0.378 | 9.510 $\pm$ 0.365  |
| Total nitrogen (%)   | 0.306 $\pm$ 0.006  | 0.485 $\pm$ 0.013  | 0.410 $\pm$ 0.014  |
| Total phosphorus (%) | 0.079 $\pm$ 0.002  | 0.051 $\pm$ 0.001  | 0.087 $\pm$ 0.004  |
| Total potassium (%)  | 2.162 $\pm$ 0.027  | 2.278 $\pm$ 0.027  | 2.024 $\pm$ 0.013  |
| Soil pH              | 5.347 $\pm$ 0.012  | 5.217 $\pm$ 0.016  | 5.310 $\pm$ 0.0358 |

**Table S3.** Canopy openness (%) at different stages of forest succession (mean  $\pm$  standard error).

|      | Early stage      | Mid stage        | Late stage       |
|------|------------------|------------------|------------------|
| 2013 | 12.45 $\pm$ 0.10 | 12.05 $\pm$ 0.11 | — —              |
| 2018 | 11.17 $\pm$ 0.15 | 10.61 $\pm$ 0.17 | 10.91 $\pm$ 0.15 |

**Table S4.** AIC and BIC values for GLMMs of seedling survival at four neighborhood radii (5, 10, 15, 20 m) at different stages of forest succession.  $\Delta$ AIC and  $\Delta$ BIC are the values of AIC and BIC of models, respectively, with 5-, 10-, and 15-m neighborhood radii minus those with the 20-m neighborhood radius. Bold indicates the optimal scale of the model. AM, arbuscular mycorrhizae; EcM, ectomycorrhizae.

| Stage of succession | Level     | Radius (m) | AIC             | $\Delta$ AIC | BIC             | $\Delta$ BIC |
|---------------------|-----------|------------|-----------------|--------------|-----------------|--------------|
| Early stage         | Community | 5          | 24067.09        | 2815.62      | 24175.76        | 2816.82      |
|                     |           | 10         | 22437.73        | 1186.26      | 22545.75        | 1186.81      |
|                     |           | 15         | 21652.43        | 400.96       | 21760.08        | 401.14       |
|                     |           | <b>20</b>  | <b>21251.47</b> | <b>0.00</b>  | <b>21358.94</b> | <b>0.00</b>  |
|                     | AM        | 5          | 22981.56        | 2491.63      | 23089.62        | 2492.68      |
|                     |           | 10         | 21539.94        | 1050.01      | 21647.43        | 1050.49      |
|                     |           | 15         | 20871.64        | 381.71       | 20978.82        | 381.88       |
|                     |           | <b>20</b>  | <b>20489.93</b> | <b>0.00</b>  | <b>20596.94</b> | <b>0.00</b>  |
|                     | EcM       | 5          | 957.25          | 295.93       | 1025.73         | 300.52       |
|                     |           | 10         | 780.02          | 118.70       | 846.27          | 121.06       |
|                     |           | 15         | 680.75          | 19.43        | 744.97          | 19.76        |
|                     |           | <b>20</b>  | <b>661.32</b>   | <b>0.00</b>  | <b>725.21</b>   | <b>0.00</b>  |
| Mid stage           | Community | 5          | 14385.20        | 2659.22      | 14484.38        | 2661.89      |
|                     |           | 10         | 13198.69        | 1472.71      | 13296.58        | 1474.10      |
|                     |           | 15         | 11779.21        | 53.23        | 11875.79        | 53.31        |
|                     |           | <b>20</b>  | <b>11725.98</b> | <b>0.00</b>  | <b>11822.48</b> | <b>0.00</b>  |
|                     | AM        | 5          | 10538.17        | 2064.70      | 10630.77        | 2067.29      |
|                     |           | 10         | 9589.87         | 1116.40      | 9681.31         | 1117.83      |
|                     |           | 15         | 8506.05         | 32.58        | 8596.13         | 32.65        |
|                     |           | <b>20</b>  | <b>8473.47</b>  | <b>0.00</b>  | <b>8563.48</b>  | <b>0.00</b>  |
|                     | EcM       | 5          | 3795.19         | 573.33       | 3882.35         | 576.13       |
|                     |           | 10         | 3570.22         | 348.36       | 3655.91         | 349.69       |
|                     |           | 15         | 3246.14         | 24.28        | 3330.57         | 24.35        |
|                     |           | <b>20</b>  | <b>3221.86</b>  | <b>0.00</b>  | <b>3306.22</b>  | <b>0.00</b>  |
| Late stage          | Community | 5          | 3521.13         | 0.37         | 3605.10         | 0.37         |
|                     |           | 10         | 3521.37         | 0.61         | 3605.33         | 0.61         |
|                     |           | <b>15</b>  | <b>3520.76</b>  | <b>0.00</b>  | <b>3604.73</b>  | <b>0.00</b>  |
|                     |           | 20         | 3521.79         | 1.02         | 3605.75         | 1.02         |
|                     | AM        | <b>5</b>   | <b>3203.37</b>  | <b>0.00</b>  | <b>3286.22</b>  | <b>0.00</b>  |
|                     |           | 10         | 3212.91         | 9.54         | 3295.76         | 9.54         |

|     |           |               |             |               |             |
|-----|-----------|---------------|-------------|---------------|-------------|
|     | 15        | 3218.42       | 15.05       | 3301.27       | 15.05       |
|     | 20        | 3219.24       | 15.87       | 3302.09       | 15.87       |
| EcM | 5         | 286.43        | 1.59        | 337.96        | 1.59        |
|     | 10        | 285.26        | 0.42        | 336.79        | 0.42        |
|     | <b>15</b> | <b>284.84</b> | <b>0.00</b> | <b>336.37</b> | <b>0.00</b> |
|     | 20        | 286.72        | 1.88        | 338.24        | 1.87        |
|     |           |               |             |               |             |

AIC: Akaike Information Criterion, BIC: Bayesian Information Criterion, GLMMs: Generalized Linear Mixed Models

Neighborhood radius = 5 m

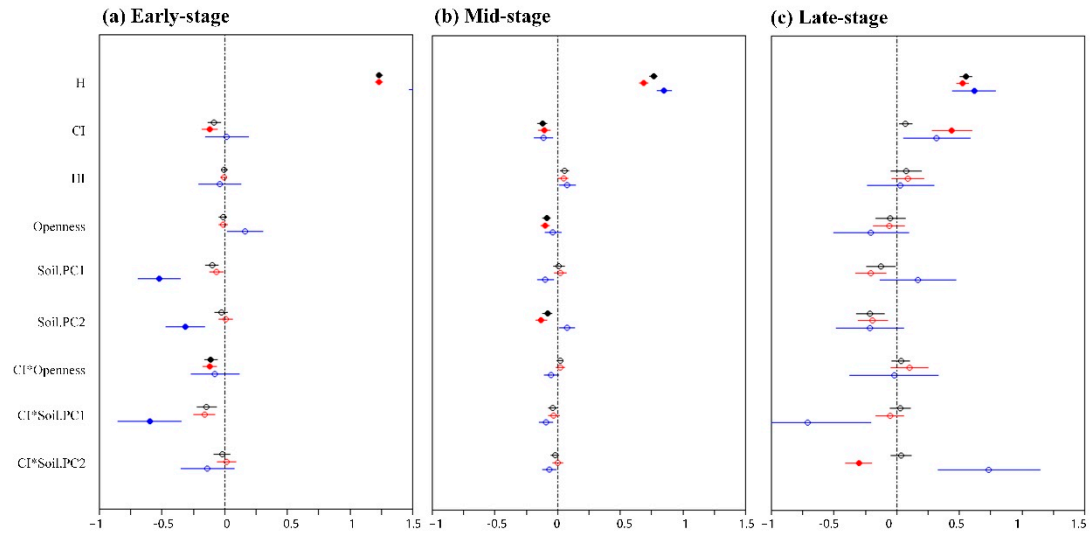

Neighborhood radius = 10 m

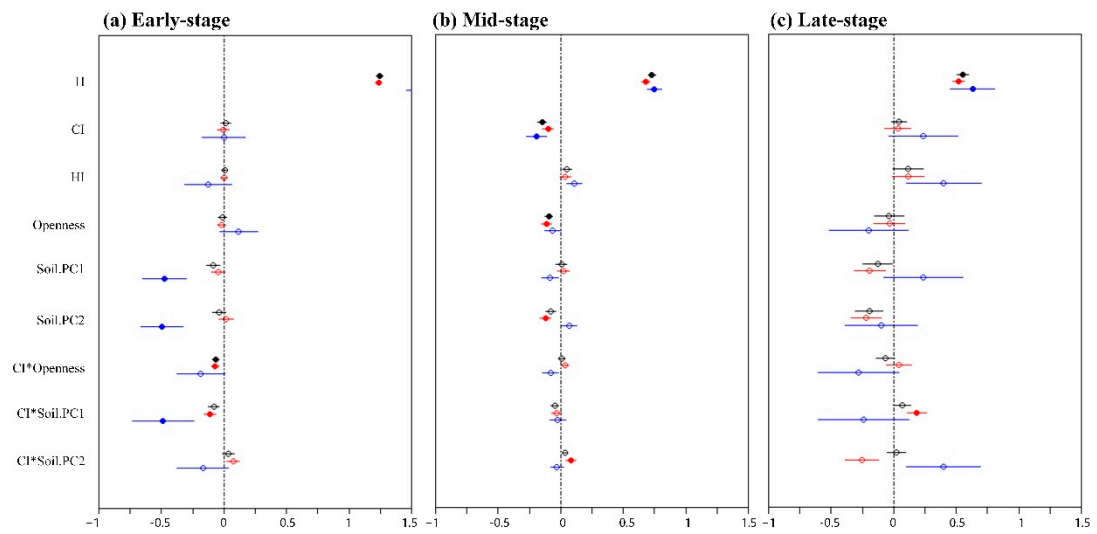

Neighborhood radius = 15 m

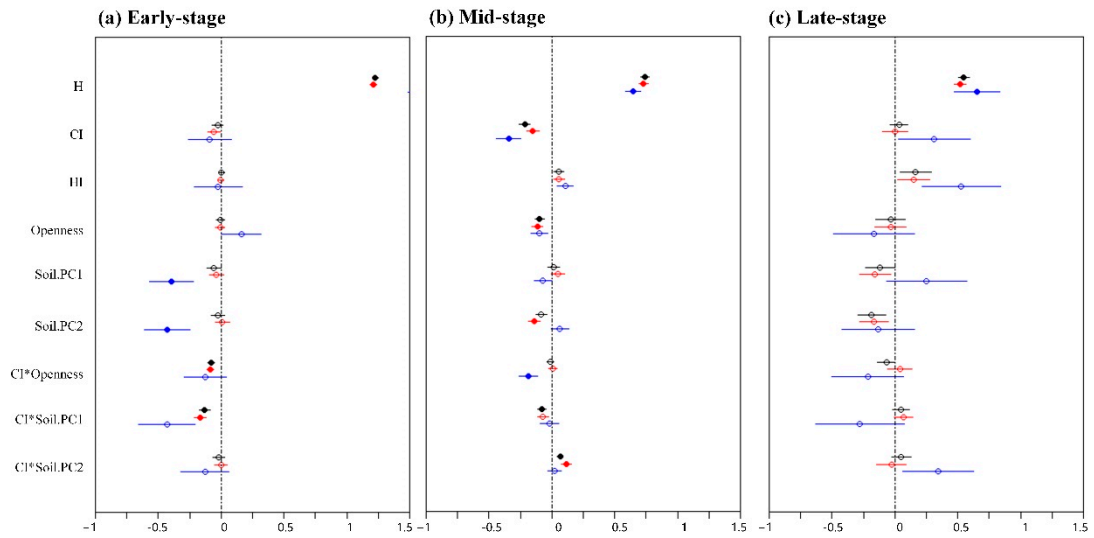

**Figure S1.** Estimated coefficients (mean  $\pm$  SE) of biotic and abiotic variables on seedling survival at different neighborhood radii in different stages of forest succession. Black circles indicate the community level (i.e., all species combined), red circles AM seedlings, and blue circles EcM seedlings. Solid circles indicate significance ( $p < 0.05$ ); circles with '+' indicate marginal significance ( $p < 0.10$ ); and hollow circles indicate no significance ( $p \geq 0.10$ ).
